# Supplementary material for: PLGA Nanoparticles for the Intraperitoneal Administration of CBD in the Treatment of Ovarian Cancer: In Vitro and In Ovo Assessment
Source: PubMed Central journal article supplement (PMC7285054; doi:10.3390/pharmaceutics12050439), 2020-05-09
Supplement: pharmaceutics-12-00439-s001.pdf [file pharmaceutics-12-00439-s001.pdf]

# Supplementary Materials: PLGA Nanoparticles for the Intraperitoneal Administration of CBD in the Treatment of Ovarian Cancer: in Vitro and in Ovo Assessment

Ana I. Fraguas-Sánchez, Ana I. Torres-Suárez, Marie Cohen, Florence Delie, Daniel Bastida-Ruiz, Lucile Yart, Cristina Martin-Sabroso and Ana Fernández-Carballido

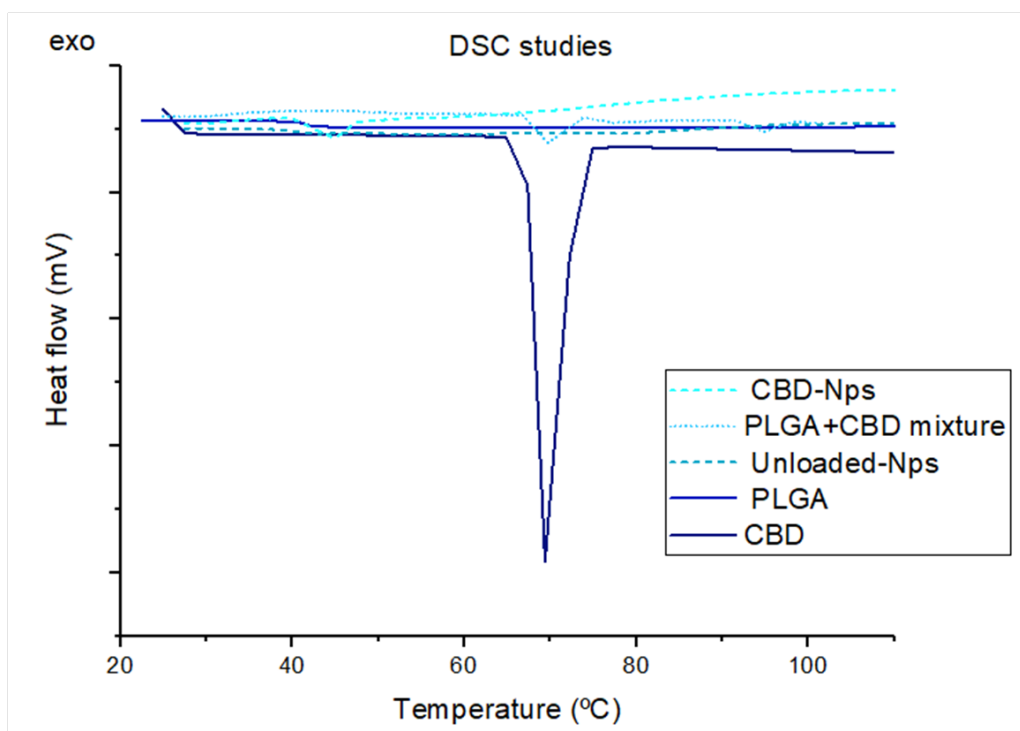

**Figure S1:** DSC thermograms of pure CBD, raw PLGA, CBD+PLGA physical mixture, unloaded and CBD-loaded nanoparticles.

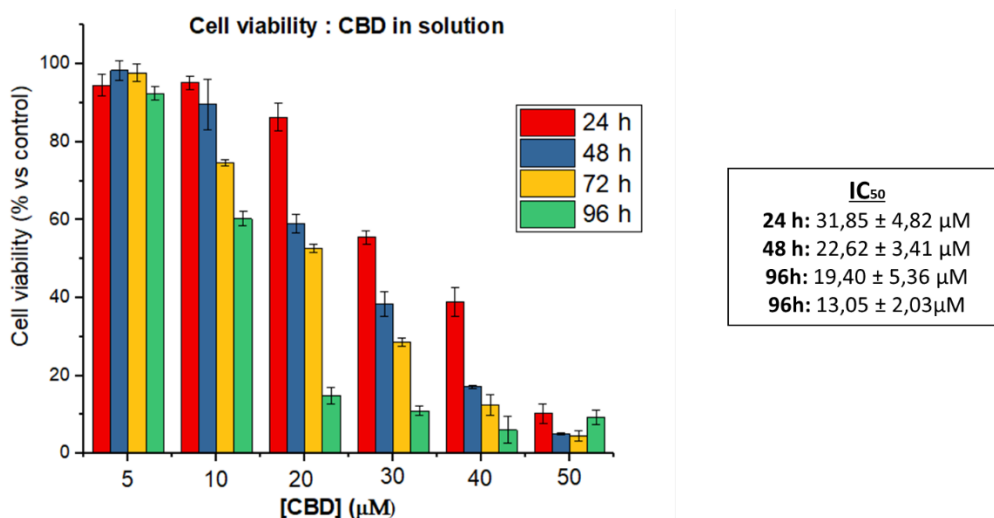

**Figure S2:** Antiproliferative activity of CBD in solution on SKOV-3 cells over a period of 96 hours ( $n = 4$ ).

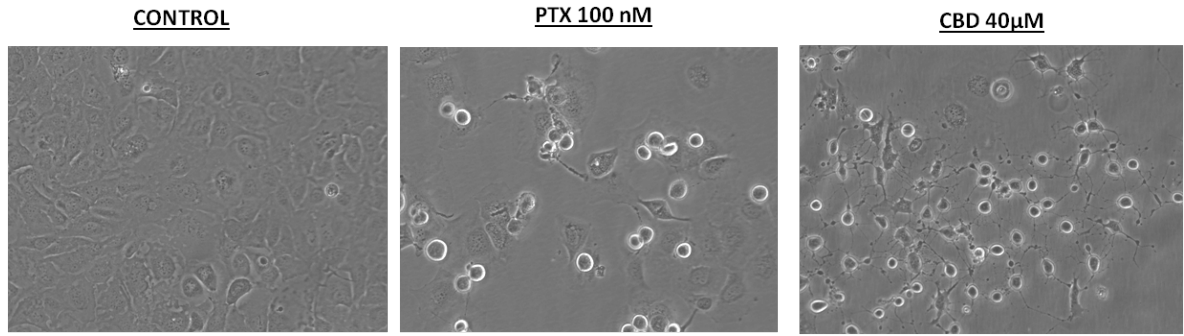

**Figure S3:** Images of SKOV-3 cells treated with cell culture medium (control), PTX (100 nM) or CBDsol (40  $\mu$ M) for 12 hours Magnification: 10 $\times$ .
